# Supplementary material for: Changes in near-bandgap photoluminescence in lead halide CsPbBr3 perovskite subjected to extreme conditions
Source: Royal Society of Chemistry journal article supplement (doi:10.1039/d5tc01955a), 2025-01-01
Supplement: d5tc01955a1.pdf [file d5tc01955a1.pdf]

## Supporting Information

### Changes in near-bandgap photoluminescence in lead halide CsPbBr<sub>3</sub> perovskite, subjected to extreme conditions

*Irina V. Zhevstovskikh <sup>\*a,b</sup>, Maksim N. Sarychev <sup>b</sup>, Igor V. Korobeinikov <sup>a</sup>, Sergey V. Ovsyannikov <sup>e,f</sup>, Olga I. Semenova <sup>c</sup>, Taisiya S. Sukhikh <sup>d</sup>, and Natalia V. Morozova <sup>a</sup>*

<sup>a</sup>M. N. Miheev Institute of Metal Physics of Ural Branch of Russian Academy of Sciences, 18 S. Kovalevskaya Str., Yekaterinburg 620137, Russia

<sup>b</sup>Ural Federal University, 19 Mira Str., Yekaterinburg 620002, Russia

<sup>c</sup>Bayerisches Geoinstitut, Universität Bayreuth, Universitätsstrasse 30, D-95447, Bayreuth, Germany

<sup>d</sup>Institute for Solid State Chemistry of Ural Branch of Russian Academy of Sciences, 91 Pervomayskaya Str., Yekaterinburg 620219, Russia

<sup>e</sup>A.V. Rzhzanov Institute of Semiconductor Physics, Siberian Branch of Russian Academy of Sciences, 13 Lavrentiev Avenue, Novosibirsk 630090, Russia

<sup>f</sup>Nikolaev Institute of Inorganic Chemistry, Siberian Branch of Russian Academy of Sciences, 3 Lavrentiev Avenue, Novosibirsk 630090, Russia

[\\*zhevstovskikh@imp.uran.ru](mailto:*zhevstovskikh@imp.uran.ru)

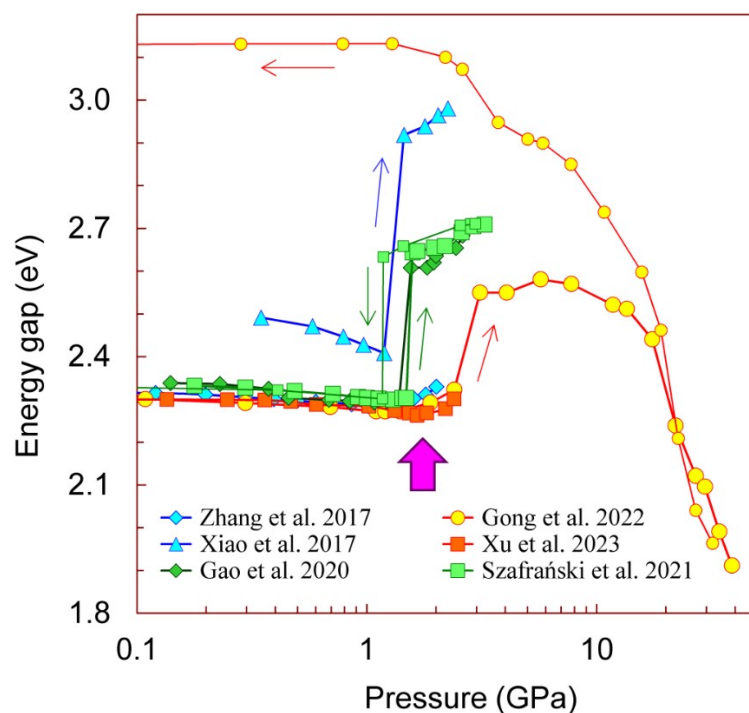

Fig. S1. Pressure dependence of the energy gap of different samples of CsPbBr<sub>3</sub> perovskite at room temperature, taken from the literature [1-6]. Zhang *et al.* - Ref. [1] for a bulk sample in silicone oil medium; Szafranski *et al.* - Ref. [2] for a single-crystal plate in isopropanol medium; Gong *et al.* - Ref. [3] for a single crystal in silicone oil medium; Xu *et al.* - Ref. [4] for a quantum dots in silicone oil medium; Gao *et al.* - Ref. [5] for a nanocrystal in silicone oil medium; Xiao *et al.* - Ref. [6] for a nanocrystal in silicone oil medium. Thin arrows indicate the direction of pressure variation. A bold vertical arrow between 1 and 2 GPa points a phase transition to a disordered phase.

**Sample Characterization.** The XRD patterns of HPT-CsPbBr<sub>3</sub> were recorded with a Bruker D8 Venture diffractometer with a CMOS PHOTON III detector and an I $\mu$ S 3.0 microfocus source (Cu K $\alpha$  radiation,  $\lambda = 1.54178$  Å, Montel focusing mirrors) at 298K. Debye diffraction patterns with continuous diffraction arcs were obtained by  $\phi$ -scanning (0.5°-frames, 360°; Fig. S4). For the PXRD patterns (Figs. S2 and S3), to diminish the effect of the preferred orientations, five  $\phi$ -scans for as-is-CsPbBr<sub>3</sub> and HPT-CsPbBr<sub>3</sub> were made at different positions of a goniometer for  $\omega$  from -240° to 0° [7]. The external standard (Si) correction and integration were performed using the Dioptas program [8].

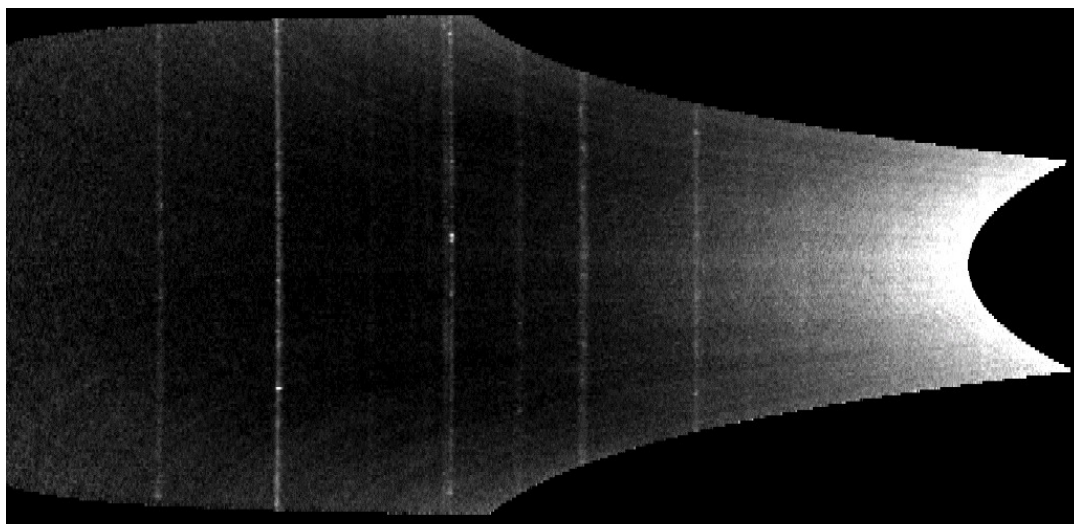

Fig. S2. 2D integration pattern ( $\phi$ -scan  $360^\circ$ ) of the HPT-CsPbBr<sub>3</sub> sample.

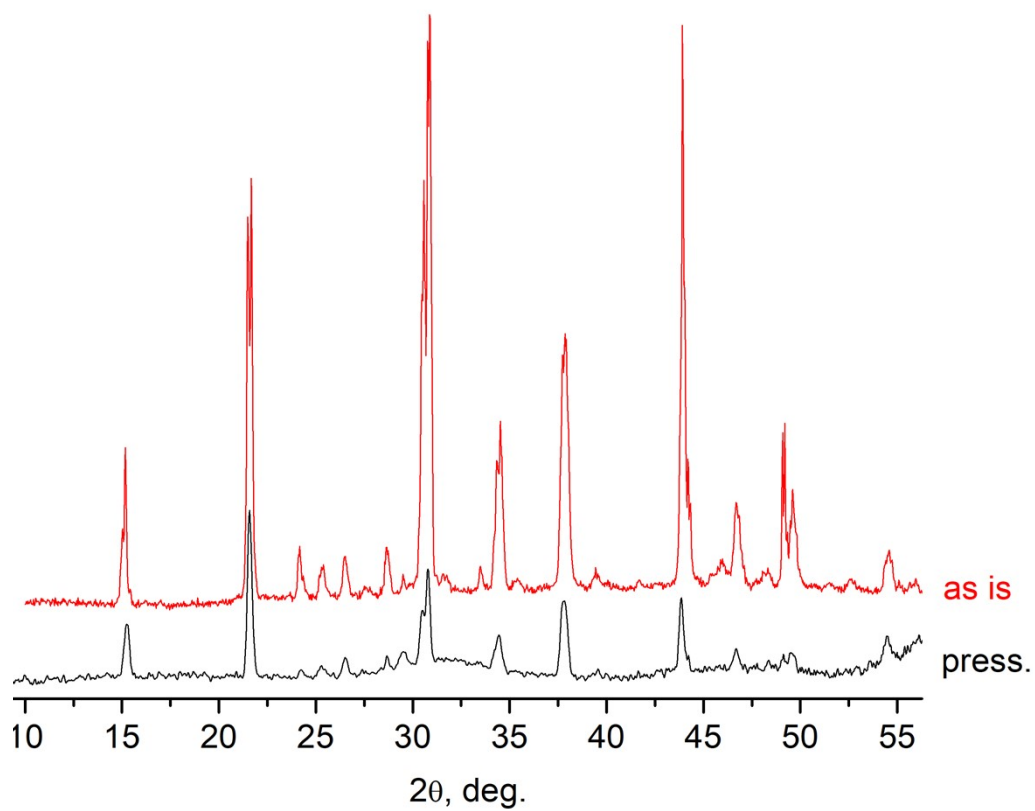

Fig. S3. Experimental powder X-ray diffraction patterns of origin CsPbBr<sub>3</sub> and HPT-CsPbBr<sub>3</sub> samples (Cu K $\alpha$ ).

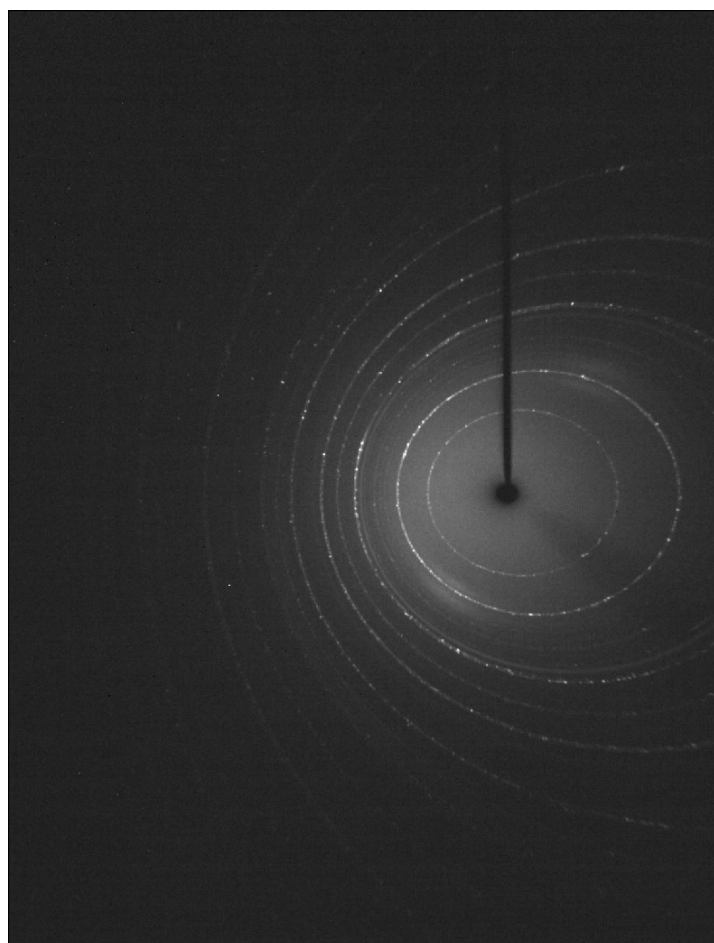

Fig. S4. Debye rings ( $\phi$ -scan of  $0.5^\circ$ -frames) of the HPT-CsPbBr<sub>3</sub> sample.

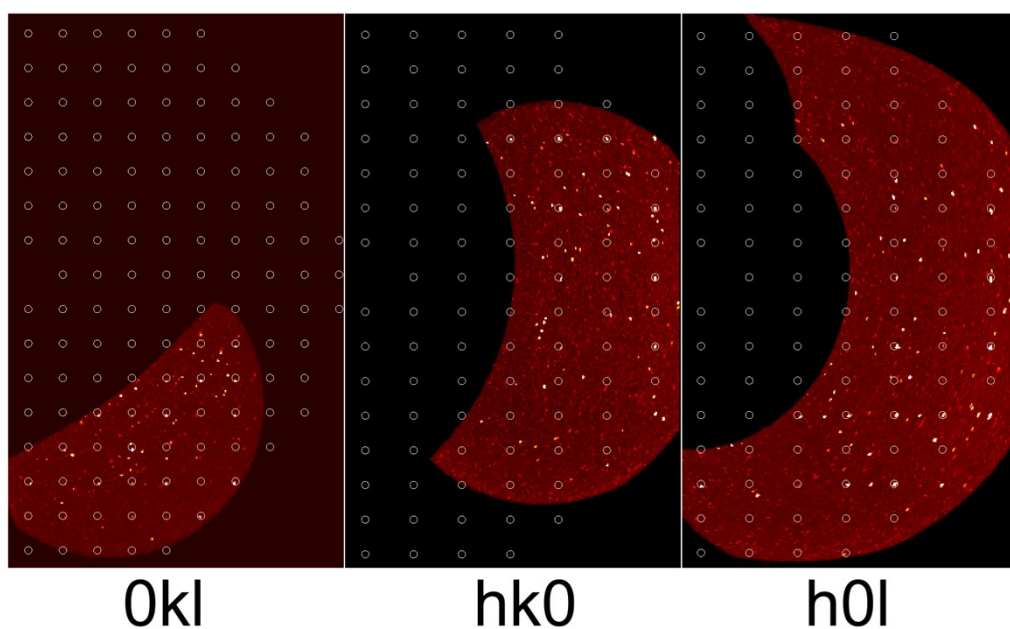

Fig. S5. Reciprocal space reconstructions for the HPT-CsPbBr<sub>3</sub> sample. White circles indicate positions of the reflections for the orthorhombic P lattice,  $a = 5.872 \text{ \AA}$ ,  $b = 8.213 \text{ \AA}$ ,  $c = 8.254 \text{ \AA}$ ,  $V = 398.1 \text{ \AA}^3$ . Superstructural reflections are unobserved.

## References

- [1] L. Zhang, Q. Zeng and K. Wang, *J. Phys. Chem. Lett.*, 2017, **8**, 3752–3758.
- [2] M. Szafrński, A. Katrusiak and K. Ståhl, *J. Mater. Chem. A*, 2021, **9**, 10769–10779.
- [3] J. Gong, H. Zhong, C. Gao, J. Peng, X. Liu, Q. Lin, G. Fang, S. Yuan, Z. Zhang and X. Xiao, *Adv. Sci.*, 2022, **9**, 2201554.
- [4] J. Xu, W. Zhang, P. Lv, F. Li, X. Zhan, Y. Zhang and X. Liu, *Small*, 2024, **20**, 2305870.
- [5] X. Gao, Q. Wang, Y. Zhang, C. Cui, N. Sui, X. Chi, H. Zhang, Q. Zhou, Y. Bao and Y. Wang, *J. Phys. Chem. C*, 2020, **124**, 11239–11247.
- [6] G. Xiao, Y. Cao, G. Qi, L. Wang, C. Liu, Z. Ma, X. Yang, Y. Sui, W. Zheng and B. Zou, *J. Am. Chem. Soc.*, 2017, **139**, 10087–10094.
- [7] A.V. Alexeev and S.A. Gromilov. X-Ray Diffraction Study of Micro Amounts of Polycrystalline Samples. *J. Struct. Chem.* **2010**, 51, 744–757;doi.org/10.1007/s10947-010-0110-3
- [8] C. Prescher and V.B. Prakapenka. DIOPTAS: a program for reduction of two-dimensional X-ray diffraction data and data exploration. *High Press. Res.* **2015**, 35, 223–230; DOI: 10.1080/08957959.2015.1059835
